# Supplementary material
Source: PubMed Central journal article supplement (PMC6352545)
Supplement: Supp_Fig1.pdf [file Supp_Fig1.pdf]

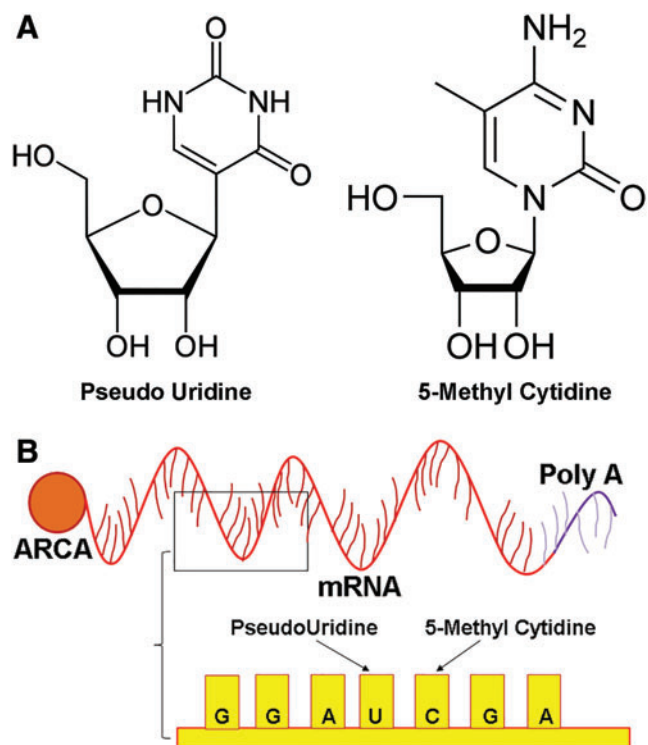

**SUPPLEMENTARY FIG. S1.** (A) Structure of pseudouridine and 5-methyl cytidine, modified nucleotides, used in this study. (B) Basic structure of synthetic mRNA molecule having ARCA cap at 5' end, coding mRNA region, and a poly-A tail at 3' end. ARCA, anti-reverse cap analogues.
