# Supplementary material
Source: PubMed Central journal article supplement (PMC6352545)
Supplement: Supp_Fig2.pdf [file Supp_Fig2.pdf]

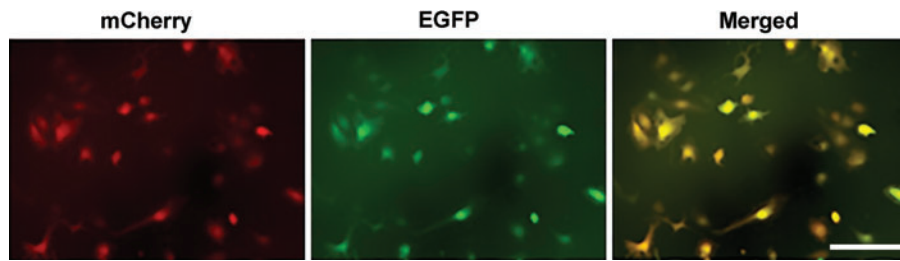

**SUPPLEMENTARY FIG. S2.** GFP and M3-mCherry mRNA expression in HEK293 cell line. Representative fluorescence image of HEK cells following modified mCherry and GFP mRNA co-transfection at 24 h. Scale bar = 100  $\mu$ m. Note the extensive co-transfection of HEK293 cells with EGFP and mCherry protein expression. EGFP, enhanced green fluorescent protein; GFP, green fluorescent protein; HEK, human embryonic kidney.

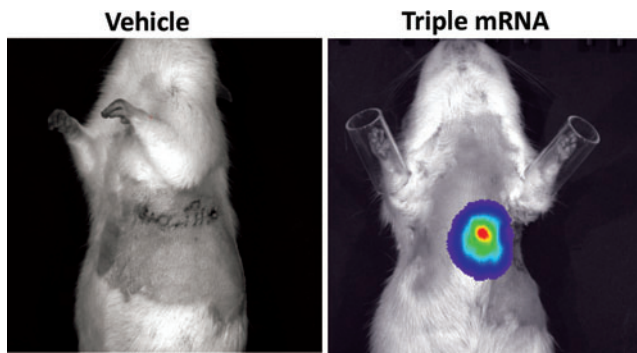

**SUPPLEMENTARY FIG. S3.** FLuc protein expression within heart upon direct myocardial injection of EGFP, mCherry, and FLuc-mRNA injections. Bioluminescence image of rat heart was acquired at 24 hours, exhibiting strong FLuc expression following direct injections of M<sup>3</sup>RNA-FLuc into the anterior left ventricle wall. FLuc, firefly luciferase; M<sup>3</sup>RNA, microencapsulated modified messenger RNA.
