# Supplementary material
Source: PubMed Central journal article supplement (PMC6352545)
Supplement: Supp_Fig3.pdf [file Supp_Fig3.pdf]

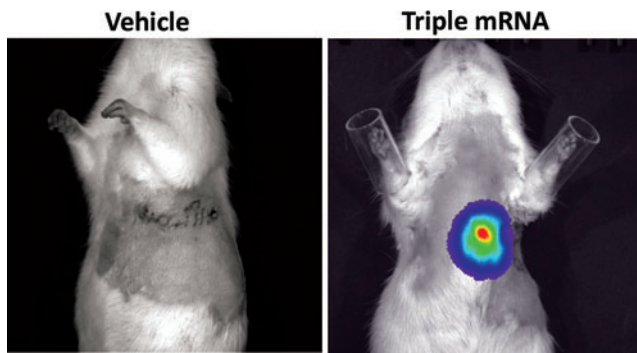

**SUPPLEMENTARY FIG. S3.** FLuc protein expression within heart upon direct myocardial injection of EGFP, mCherry, and FLuc-mRNA injections. Bioluminescence image of rat heart was acquired at 24 hours, exhibiting strong FLuc expression following direct injections of M<sup>3</sup>RNA-FLuc into the anterior left ventricle wall. FLuc, firefly luciferase; M<sup>3</sup>RNA, microencapsulated modified messenger RNA.
