# Supplementary material
Source: PubMed Central journal article supplement (PMC6352545)
Supplement: Supp_Fig4.pdf [file Supp_Fig4.pdf]

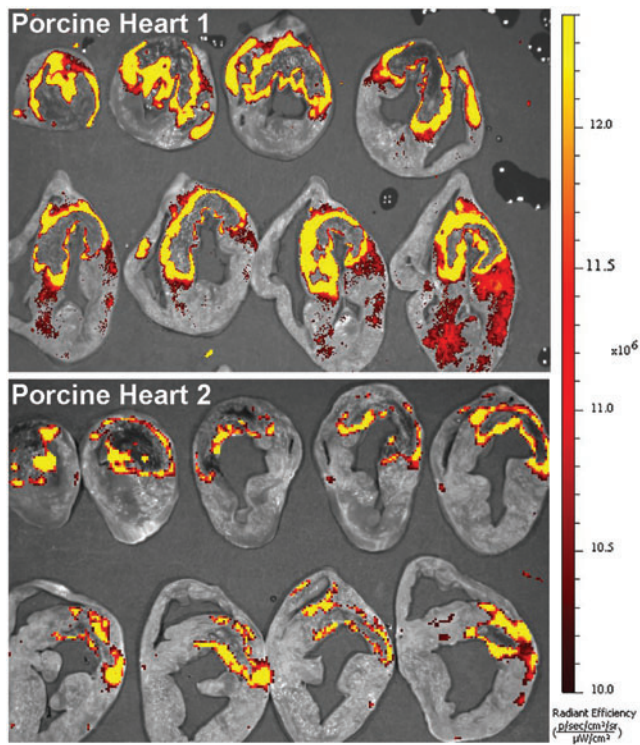

**SUPPLEMENTARY FIG. S4.** mCherry protein expression within heart slices upon intracoronary administration of mCherry M3RNA administration within porcine infarcted heart. Representative pig heart sections from two separate experiments were removed and flushed with chilled sterile normal saline and sectioned, and were imaged to document mCherry expression surrounding the anterior wall infarcted area in most of the areas starting from the apex to the mid-papillary portion of the left ventricle.
